# Supplementary material
Source: Research Square preprint supplement (doi:10.21203/rs.3.rs-8970690/v1)
Supplement: Supplementary file 1 [file 89b292c47fae252523626455.docx]

**Social-Emotional Health and Cognitive Functioning Among Individuals from Families Enriched for Alcohol Use Disorder**

**Supplementary Materials**

### Gayathri Pandey∞a*, Ashwini Kumar Pandey∞a, Chella Kamarajan∞a, Stacey Saenz de Viteri∞a, Weipeng Kuangǂ a Sivan Kinreich∞a, Christian Richard∞a, David Balin Chorlianǂa, Bernice Porjesz∞a, Jacquelyn Leigh Meyers∞a

**a**Henri Begleiter Neurodynamics Laboratory, SUNY Downstate Medical Center, Brooklyn, NY 11203, USA

* Corresponding author

∞ PhD

ǂ MS

µ MBA

$ BA

Address for reprints and correspondence: Gayathri Pandey, Ph.D.

Henri Begleiter Neurodynamics Laboratory, Department of Psychiatry and Behavioral Sciences, 450 Clarkson Avenue, MSC #1203, Brooklyn, NY 11203, USA

Email: [Gayathri.Pandey@downstate.edu](mailto:Gayathri.Pandey@downstate.edu)

Tel: 1-718-270-2231

Fax: 1-718-270-4081

**Sources of Support:** Grants # U01AA008401 and K01AA030610 from the National Institute on Alcohol Abuse and Alcoholism (NIAAA)

**Table S1.** HMR analysis results for fluid cognition

| **Predictors** | **Emotional Support**  **(Model 1)** |  | **Instrumental**  **Support**  **(Model 2)** |  | **Friendship (Model 3)** |  | **Loneliness (Model 4)** |  | **Perceived Stress (Model 5)** |  | **Negative Affect (Model 6)** |  |
| --- | --- | --- | --- | --- | --- | --- | --- | --- | --- | --- | --- | --- |
| **Main Effects** | β (SE) | *p* | β (SE) | *p* | β (SE) | *p* | β (SE) | *p* | β (SE) | *p* | β (SE) | *p* |
| Social-Emotional Factor | **.08 (.03)** | **0.002** | **.09 (.03)** | 0.002 | **.08 (.03)** | **0.007** | -.03 (.03) | 0.253 | **-.10 (.04)** | **0.001** | **-.08 (.03)** | **0.006** |
| Gender (Male vs. Female) | .04 (.34) | 0.155 | .04 (.33) | 0.138 | .04 (.34) | 0.186 | **.06 (.34)** | **0.023** | .05 (.33) | 0.057 | **.05 (.33)** | **0.044** |
| Age Group (Later Life vs. Younger) | -0.03 (.33) | 0.277 | -.04 (.33) | 0.139 | -.04 (.33) | 0.143 | -.03 (.35) | 0.305 | **-.06 (.33)** | **0.043** | **-.06 (.34)** | **0.045** |
| AUD Dx (Yes vs. No) | -0.02 (.33) | 0.482 | -.02 (.33) | 0.432 | -.03 (.33) | 0.321 | -.02 (.35) | 0.42 | -.02 (.34) | 0.435 | -01 (.33) | 0.732 |
| **Two-Way Interactions** |  | | | | | | | | | | | |
| S-E Factor × Age Group | .05 (.03) | 0.062 | **.06 (.03)** | **0.041** | .03 (.03) | 0.237 | **-.07 (.03)** | **0.026** | -.06 (.03) | 0.051 | **-.07 (.03)** | **0.015** |
| S-E Factor × AUD Dx | .03 (.03) | 0.303 | .01 (.03) | 0.754 | -.00 (.03) | 0.925 | -.01 (.03) | 0.793 | .02 (.03) | 0.389 | -.02 (.03) | 0.538 |
| S-E Factor × Gender | **.06 (.03)** | **0.04** | -.00 (.03) | 0.939 | .03 (.03) | 0.237 | **-.07 (.03)** | **0.021** | -.01 (.03) | 0.736 | -.03 (.03) | 0.293 |
| **Three-Way Interactions** |  | | | | | | | | | | | |
| S-E Factor × Gender × Age Group | -.01 (.03) | 0.611 | -.02 (.03) | 0.567 | -.04 (.03) | 0.118 | **.05 (.03)** | **0.042** | .04 (.03) | 0.161 | .04 (.03) | 0.132 |
| S-E Factor × AUD Dx × Age Group | -0.02 (.03) | 0.531 | .01 (.03) | 0.811 | -.02 (.03) | 0.503 | .02 (.03) | 0.417 | .01 (.03) | 0.773 | .03 (.03) | 0.211 |
| **Model Fit Index** | | | | | | | | | | | | |
| Main Effects (R2) | 0.01 |  | 0.01 |  | 0.01 |  | 0.01 |  | 0.01 |  | 0.01 |  |
| F-statistic | **5.79** | **<.001** | **5.35** | **<.001** | **4.22** | **0.002** | **2.68** | **0.03** | **5.21** | **<.001** | **4.6** | **0.001** |
| Two-Way Interactions (ΔR2) | 0.02 |  | 0.02 |  | 0.01 |  | 0.01 |  | 0.02 |  | 0.02 |  |
| F-change | 2.75 | 0.042 | 1.51 | 0.208 | 0.49 | 0.687 | **2.93** | **0.032** | 1.07 | 0.36 | 1.74 | 0.155 |
| Three-Way Interactions (ΔR2) | 0.02 |  | 0.02 |  | 0.01 |  | 0.02 |  | 0.02 |  | 0.2 |  |
| F-change | 0.29 | 0.742 | 0.22 | 0.804 | 1.34 | 0.262 | 2.32 | 0.098 | 1 | 0.368 | 1.82 | 0.161 |

**Table S1.** HMR analysis results for crystallized cognition

| **Predictors** | **Emotional Support**  **(Model 1)** |  | **Instrumental**  **Support**  **(Model 2)** |  | **Friendship (Model 3)** |  | **Loneliness (Model 4)** |  | **Perceived Stress (Model 5)** |  | **Negative Affect (Model 6)** |  |
| --- | --- | --- | --- | --- | --- | --- | --- | --- | --- | --- | --- | --- |
| **Main Effects** | β (SE) | *p* | β (SE) | *p* | β (SE) | *p* | β (SE) | *p* | β (SE) | *p* | β (SE) | *p* |
| Social-Emotional Factor | 0.026 (.02) | 0.363 | -0.006 (.02) | 0.832 | -0.002 (.02) | 0.936 | **0.087 (.02)** | **0.002** | **-0.08 (.03)** | **0.006** | -0.026 (.02) | 0.373 |
| Gender (Male vs. Female) | -0.029 (.28) | 0.309 | -0.029 (.28) | 0.303 | -0.03 (.28) | 0.287 | -0.013 (.29) | 0.641 | -0.015 (.28) | 0.583 | -0.017 (.28) | 0.542 |
| Age Group (Later Life vs. Younger) | -0.019 (.28) | 0.501 | -0.026 (.28) | 0.343 | -0.031 (.28) | 0.272 | 0.004 (.29) | 0.898 | -0.038 (.28) | 0.17 | -0.025 (.28) | 0.374 |
| AUD Dx (Yes vs. No) | 0.005 (.28) | 0.852 | -0.004 (.28) | 0.885 | 0.004 (.28) | 0.884 | 0.003 (.29) | 0.913 | 0.021 (.28) | 0.452 | 0.013 (.28) | 0.64 |
| **Two-Way Interactions** |  | | | | | | | | | | | |
| S-E Factor × Age Group | 0.002 (.27) | 0.957 | 0.017 (.02) | 0.548 | 0.006 (.02) | 0.852 | **-0.074 (.02)** | **0.014** | -0.105 (.03) | <.001 | **-0.106 (.02)** | **<.001** |
| S-E Factor × AUD Dx | 0.035 (.27) | 0.212 | 0.002 (.02) | 0.938 | 0.033 (.02) | 0.252 | -0.03 (.02) | 0.308 | 0.009 (.03) | 0.747 | -0.03 (.02) | 0.27 |
| S-E Factor × Gender | 0.03 (.27) | 0.289 | -0.016 (.02) | 0.572 | -0.001 (.02) | 0.96 | -0.034 (.02) | 0.237 | -0.011 (.03) | 0.706 | -0.031 (.02) | 0.254 |
| **Three-Way Interactions** |  |  |  |  |  |  |  |  |  |  |  |  |
| S-E Factor × Gender × Age Group | **-0.075 (.02)** | **0.006** | -0.035 (.02) | 0.205 | -0.025 (.02) | 0.359 | 0.049 (.02) | 0.071 | 0.034 (.03) | 0.22 | 0.042 (.02) | 0.123 |
| S-E Factor × AUD Dx × Age Group | 0.015 (.02) | 0.586 | -0.002 (.02) | 0.952 | -0.028 (.02) | 0.321 | 0.008 (.02) | 0.766 | 0.046 (.03) | 0.102 | 0.005 (.02) | 0.863 |
| **Model Fit Index** | | | | | | | | | | | | |
| Main Effects (R2) | 0 |  | 0.002 |  | 0.002 |  | 0.006 |  | 0.009 |  | 0.004 |  |
| F-statistic | 1.07 | 0.368 | 0.646 | 0.63 | 0.625 | 0.644 | 2.281 | 0.059 | 3.245 | 0.012 | 1.425 | 0.223 |
| Two-Way Interactions (ΔR2) | 0.002 |  | 0.001 |  | 0.001 |  | 0.005 |  | 0.007 |  | 0.011 |  |
| F-change | 0.739 | 0.529 | 0.25 | 0.861 | 0.418 | 0.74 | 2.539 | 0.055 | 3.305 | 0.02 | **5.27** | **0.001** |
| Three-Way Interactions (ΔR2) | 0.006 |  | 0.001 |  | 0.001 |  | 0.002 |  | 0.003 |  | 0.002 |  |
| F-change | **4.13*** | **0.016** | 0.812 | 0.444 | 0.816 | 0.443 | 1.659 | 0.191 | 1.957 | 0.142 | 1.192 | 0.304 |

**Table S3.** Bivariate correlations among the key variables.

| Variables | 1 | 2 | 3 | 4 | 5 | 6 | 7 | 8 | 9 | 10 | 11 | 12 | 13 |
| --- | --- | --- | --- | --- | --- | --- | --- | --- | --- | --- | --- | --- | --- |
| 1. Sex | -- |  |  |  |  |  |  |  |  |  |  |  |  |
| 2. Race/Ethnicity | .016. | -- |  |  |  |  |  |  |  |  |  |  |  |
| 3. DSM-5 AUD dx | -.190** | -.033 | -- |  |  |  |  |  |  |  |  |  |  |
| 4. Age group | .015 | -.061* | .085 | -- |  |  |  |  |  |  |  |  |  |
| 5. Emotional Support | .143** | -.031 | -.097** | -.003 | -- |  |  |  |  |  |  |  |  |
| 6. Instrumental Support | .038 | -.033 | -.127** | .105** | .529** | -- |  |  |  |  |  |  |  |
| 7. Friendship | .074** | -.027 | -.113** | .032 | .601** | .463** | -- |  |  |  |  |  |  |
| 8. Loneliness | .004 | .027 | .096** | -.112** | -.528** | -.426** | -.608** | -- |  |  |  |  |  |
| 9. Negative Affect | .052* | .028 | .134** | -.154** | -.421** | -.331** | -.452** | .674** | -- |  |  |  |  |
| 10. Perceived Stress | .046 | .046 | .091** | -.189** | -.373** | -.329** | -.414** | .591** | .866** | -- |  |  |  |
| 11. Fluid Cognition | .047 | -.064* | -.044 | -.053* | .112** | .098** | .085** | -.045 | -.081** | -.087** | -- |  |  |
| 12. Crystallized Cognition | -.026 | -.055* | .003 | -.033 | .030 | -.012 | -.005 | .071** | -.042 | -.079** | .337** | -- |  |
| 13. Physical Functioning | -.062* | -.053 | -.075** | -.244** | .155** | .030 | .185** | -.147** | -.170** | -.144** | .119** | .066* | -- |

*Note.* **p* < .05, ***p* < .01.
